# Supplementary material
Source: Royal Society of Chemistry journal article supplement (doi:10.1039/d6cp01438k)
Supplement: d6cp01438k1.pdf [file d6cp01438k1.pdf]

## Electric field-induced bond length and bandgap tunability for enhanced reactivity of nitride nanorings

Riddhi Sainda <sup>a</sup>, Prafulla K. Jha\*<sup>a</sup>

<sup>a</sup>Department of physics, Faculty of Science, The Maharaja Sayajirao University of Baroda, Vadodara, Gujarat-390002.

\*Corresponding author: <sup>a</sup> [prafullaj@yahoo.com](mailto:prafullaj@yahoo.com)

### Supplementary information:

**Table S1: The HOMO and LUMO energy values of Al<sub>9</sub>N<sub>9</sub> and B<sub>9</sub>N<sub>9</sub> nanorings with different external electric field values, respectively.**

| System/electric field (EF) (a.u.) | Al <sub>9</sub> N <sub>9</sub> nanoring |           | B <sub>9</sub> N <sub>9</sub> nanoring |           |
|-----------------------------------|-----------------------------------------|-----------|----------------------------------------|-----------|
|                                   | HOMO (eV)                               | LUMO (eV) | HOMO (eV)                              | LUMO (eV) |
| 0.00                              | -8.72                                   | -1.16     | -9.75                                  | 0.30      |
| 0.01                              | -8.68                                   | -1.18     | -9.74                                  | -0.13     |
| 0.02                              | -8.60                                   | -1.34     | -9.73                                  | -0.95     |
| 0.03                              | -8.52                                   | -1.60     | -9.72                                  | -1.88     |
| 0.04                              | -8.47                                   | -2.59     | -9.82                                  | -4.73     |
| 0.05                              | -8.51                                   | -3.60     | -11.30                                 | -7.91     |

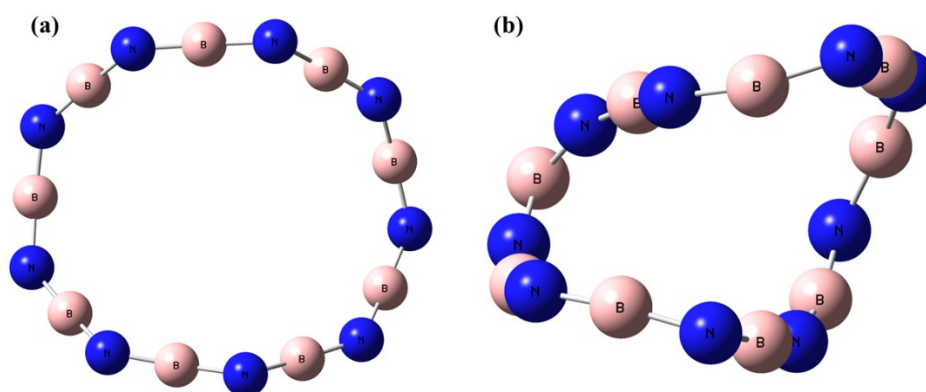

**Figure S1: The geometrical structure of B<sub>9</sub>N<sub>9</sub> nanoring at 0.04 a.u. (a) and 0.05 a.u. (b) value of the external electric field, respectively (Boron is shown as a pink sphere and nitrogen is indicated as a blue sphere, respectively).**

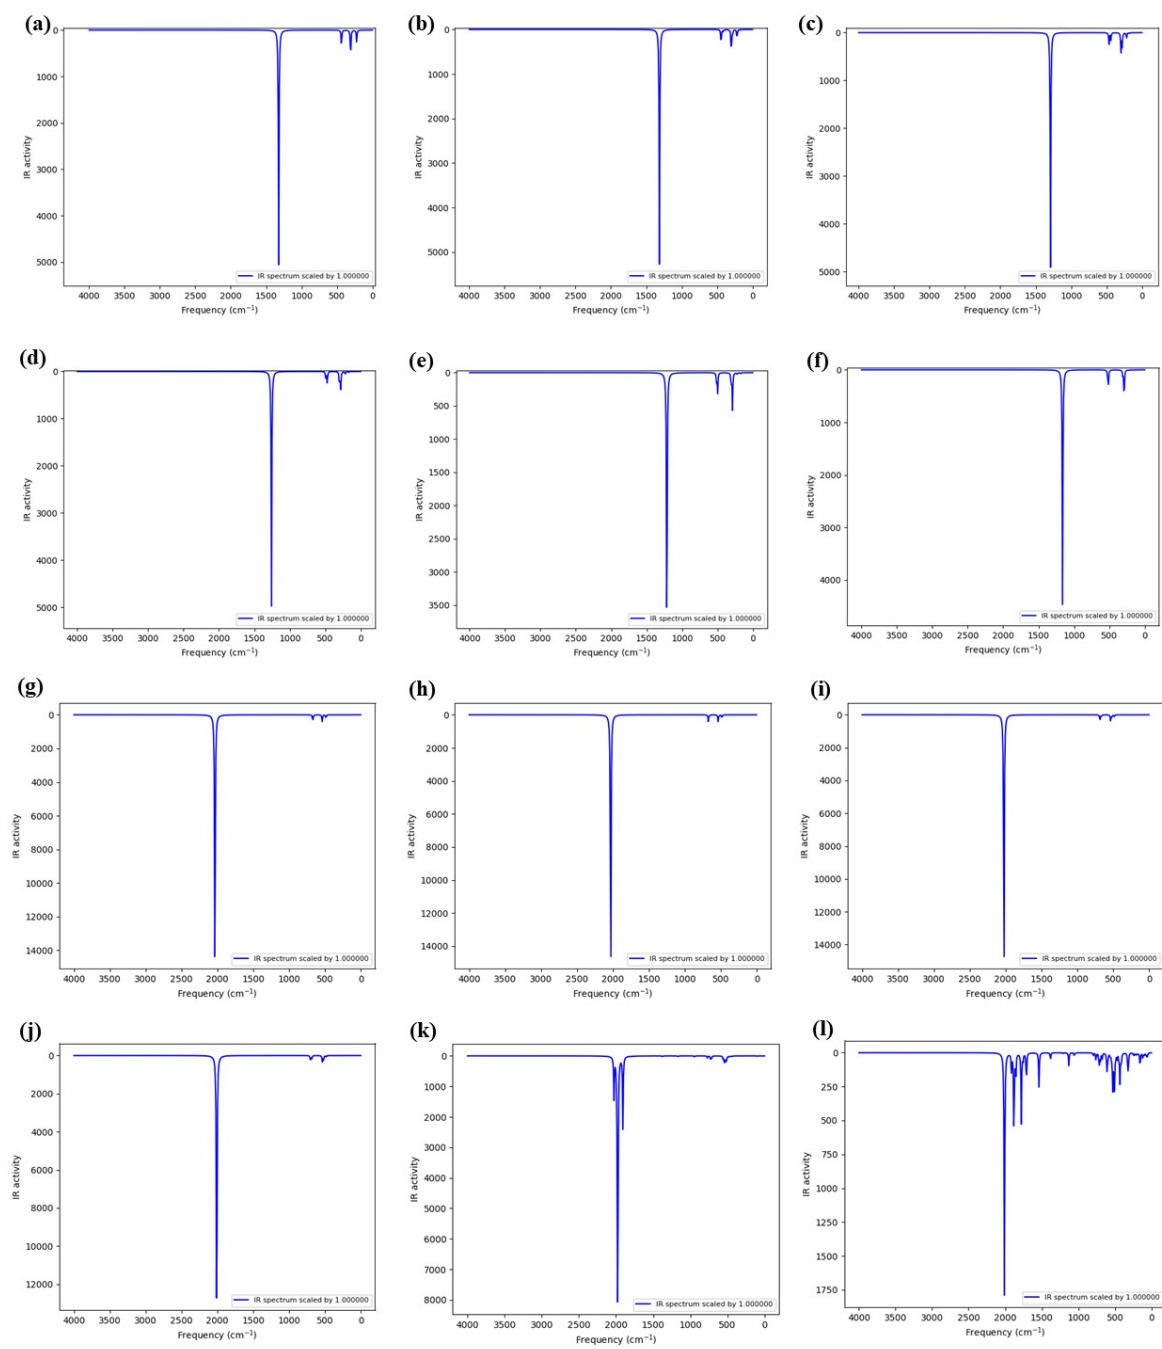

**Figure S2: The IR spectra of  $\text{Al}_9\text{N}_9$  nanoring (a-f), and  $\text{B}_9\text{N}_9$  nanoring (i-l), at external electric field from 0.00 to 0.05 a.u., respectively.**

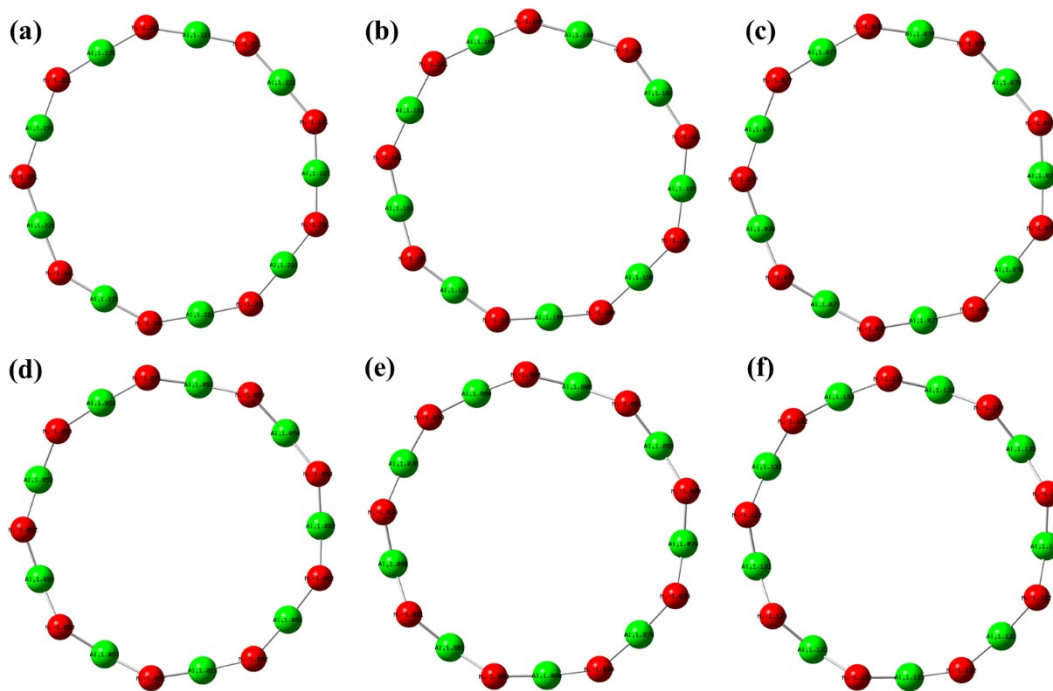

**Figure S3: The Mulliken charge distribution of  $\text{Al}_9\text{N}_9$  nanoring with respect to the external electric field (Red spheres represent negatively charged atoms, while green spheres represent positively charged atoms, respectively).**

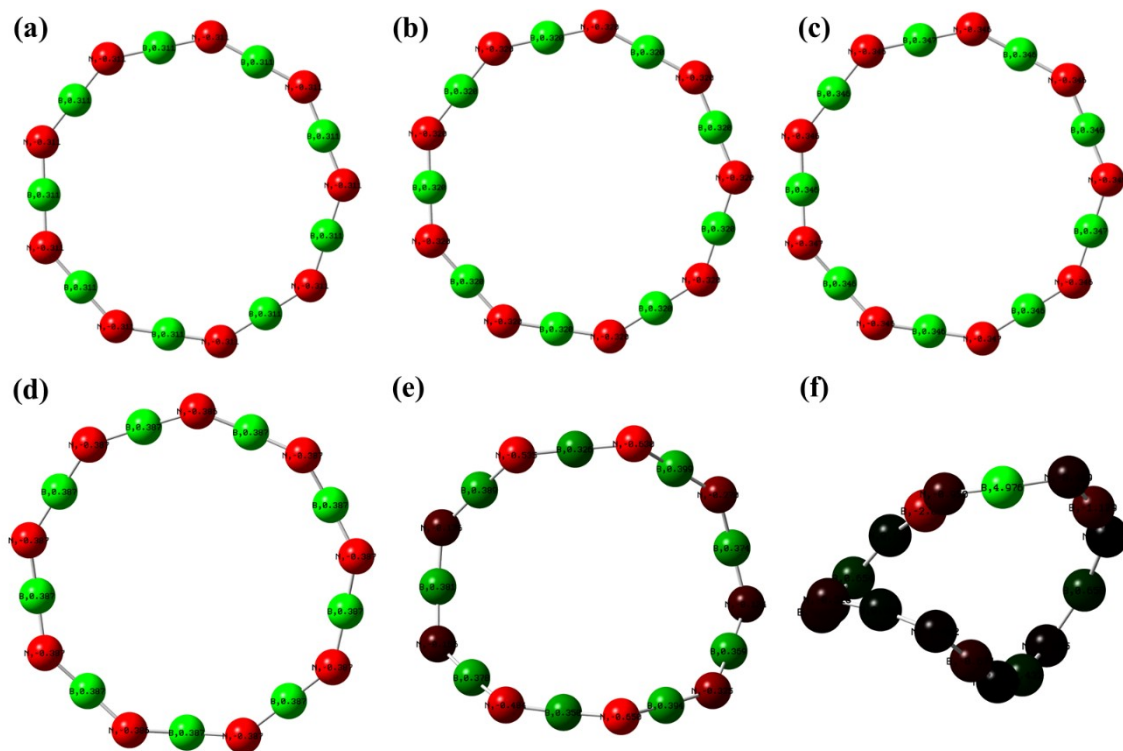

**Figure S4: The Mulliken charge distribution of  $\text{B}_9\text{N}_9$  nanoring with respect to the external electric field (Red spheres represent negatively charged atoms, while green spheres represent positively charged atoms, respectively).**
